# Supplementary material
Source: publisher site journal article supplement (http://scielo.br/pdf/rmat/v22s1/1517-7076-rmat-22-suppl-e11932.pdf)
Supplement: Supplementary file 1 [file 1517-7076-rmat-22-suppl-e11932.pdf]

## Estudo e caracterização de compósitos de resina epóxi em *gel coat* com diferentes teores de cargas inorgânicas

Study and characterization of epoxy resin composites in gel coat with different contents of inorganic fillers

Ana Gabriela dos Santos<sup>1</sup>, Giannini Pazisnick Apati<sup>1</sup>,  
Márcia Luciane Lange Silveira<sup>1</sup>, Ana Paula Testa Pezzin<sup>2</sup>

<sup>1</sup> Departamento de Engenharia Química, Universidade da Região de Joinville - UNIVILLE, Joinville – SC

<sup>2</sup> Mestrado em Engenharia de Processos, Universidade da Região de Joinville – UNIVILLE, Joinville – SC,  
e-mail: anapezzin@yahoo.com.br

### RESUMO

As resinas epóxi em *gel coat* utilizadas em laminação de moldes precisam conferir à peça um alto brilho e homogeneidade, garantindo a qualidade estética e as propriedades mecânicas. Desta forma, o presente trabalho objetivou estudar a formulação de compósitos de resina epóxi/cargas inorgânicas visando à melhoria das propriedades físicas e mecânicas. Foi realizado um planejamento experimental  $2^3$  completo com três pontos centrais, totalizando 11 formulações de compósito de resina epóxi *gel coat*, nas quais foram avaliadas a influência das cargas dióxido de titânio ( $\text{TiO}_2$ ) (20, 45 e 70 phr), calcita (0, 20 e 40 phr) e barita (0, 20 e 40 phr) nas propriedades físicas, densidade e nível de escoamento e na dureza. Foram observadas variações consideráveis nas propriedades dos compósitos com as modificações realizadas nas formulações. Verificou-se no planejamento experimental, que a variável densidade foi significativa em relação às três variáveis independentes e não significativa na falta de ajuste, deste modo, o modelo representou adequadamente o comportamento experimental. Para a variável dureza, o modelo linear não descreveu satisfatoriamente a influência das cargas. De acordo com os ensaios realizados, observou-se que com a redução de  $\text{TiO}_2$  caracterizou um aumento na dureza, portanto, uma redução na densidade. Por outro lado, a barita exerceu uma influência positiva nas duas propriedades e a calcita não apresentou influência significativa. Em relação ao nível de escoamento, as amostras que apresentaram maiores quantidades de cargas, foram as que melhor se comportaram nessa propriedade. Finalmente, foi realizada uma nova formulação que foi validada pelo modelo da densidade (60 partes de  $\text{TiO}_2$ , 30 partes de calcita e 20 partes de barita) que atendeu as especificações.

**Palavras-chave:** Barita, Calcita, Dureza, Planejamento experimental,  $\text{TiO}_2$ .

### ABSTRACT

The gel coat epoxy resins used in mold lamination need to give the piece a high gloss and homogeneity, guaranteeing aesthetic quality and mechanical properties. In this way, the present work aimed to study the formulation of epoxy resin composites/inorganic fillers aiming at the improvement of physical and mechanical properties. A complete experimental design was carried out with three central points, totaling 11 formulations of epoxy gel coat composite, in which the influence of titanium dioxide ( $\text{TiO}_2$ ) (20, 45 and 70 phr), calcite (0, 20 and 40 phr) and barite (0, 20 and 40 phr) in the physical properties, density and drainage level and hardness. Considerable variations were observed in the properties of the composites with the modifications made in the formulations. It was verified in the experimental planning that the variable density was significant in relation to the three independent variables and not significant in the lack of fit, in this way, the model adequately represented the experimental behavior. For the variable hardness, the linear model did not satisfactorily describe the influence of the loads. According to the tests carried out, it was observed that with reduction of  $\text{TiO}_2$  characterized an increase in hardness, therefore, a reduction in density. On the other hand the baryta exerted a positive influence on the two properties and the calcite did not present significant influence. Regarding the level of runoff, the samples that presented the greatest amount of loads were the ones that performed best on this property. Finally, a new formulation was performed that was validated by the density

model (60 parts TiO<sub>2</sub>, 30 parts calcite and 20 parts barite) that met the specifications.

**Keywords:** Barite, Calcite, Toughness, Experimental planning, TiO<sub>2</sub>.

## 1. INTRODUÇÃO

A exigência na qualidade e no desempenho em superfícies de moldes cerâmicos, em indústrias cerâmicas vem aumentando em decorrência do crescimento do mercado, sendo um setor competitivo e inovador. Assim, é necessário conhecer e aprimorar tecnologias que garantam as propriedades destes materiais juntamente com a aplicação. As resinas termofixas podem ser utilizadas para os revestimentos de superfícies deste tipo de molde, pois são estáveis à ação de solventes, resistentes a altas temperaturas e proporcionam alta rigidez ao material. Com o aumento da temperatura, os termofixos alteram-se antes da sua fusão, processo chamado de cura, que promove uma transformação química irreversível, o que os impedem de serem remoldados, tornando-os rígidos e não recicláveis mecanicamente [1]. Dependendo da composição química, estas resinas podem ser divididas nas classes fenólica, furânica, poliéster, estervinílica ou epóxi [2]. As resinas epóxi são utilizadas em várias aplicações na indústria, podendo ser utilizadas como isoladores, encapsulantes, calafetante, primer anticorrosivo, adesão de concreto novo com velho, remendo de trincas e fissuras, junta de dilatação e rejunte, piso industrial monolítico, adesivos de metais e madeiras para colagem automotivas, naval, de móveis, aeronaves, aeromodelismo, em bijuterias para colagem de pedras, metais e plásticos [3]. Também são utilizadas em laminados de fibra sintéticas como o de vidro, carbono e kevlar e também com naturais como juta, sisal, algodão, para tubulações, tanques, aeronaves, embarcações, veículos de alta performance, artigos esportivos, revestimentos especiais. Devido ao rápido processo de cura, alta resistência mecânica, impermeabilidade, moldagem a frio e estabilidade dimensional [4], as resinas epóxi podem ser utilizadas para confeccionar protótipos, modelos e moldes para diversas aplicações, desde a metalmecânica até odontológica [3, 5].

A resina epóxi utilizada tem como base o diglicidil éter do bisfenol A (DGEBA) (Figura 1) [6].

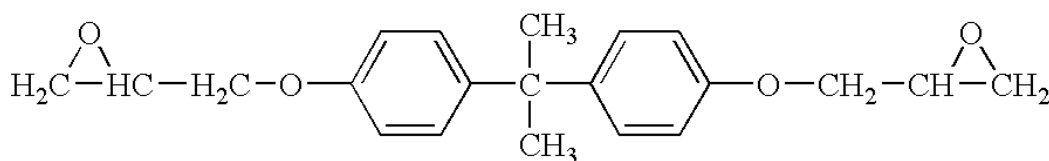

**Figura 1:** Estrutura polimérica do diglicidil éter do bisfenol A.

Durante o tratamento térmico inicial, ligações cruzadas covalentes são formadas entre cadeias moleculares adjacentes. Estas ligações prendem as cadeias entre si para resistir aos movimentos vibracionais e rotacionais da cadeia a temperaturas elevadas, sendo que o rompimento destas ligações só ocorrerá em temperatura muito elevada [7]. Muitos compósitos são materiais bifásicos, isto é, são constituídos por apenas duas fases; sendo uma denominada de matriz que é contínua e envolve a outra fase, chamada de fase dispersa ou de reforço [7]. As cargas podem ser classificadas como de enchimento ou de reforço, sendo as primeiras inertes e empregadas para diminuir o custo do compósito, não alterando as propriedades do material. Já as cargas de reforço modificam as propriedades mecânicas do mesmo. Cada uma das várias características da carga mineral (granulometria, dureza, composição química, etc.) exerce algum efeito nas propriedades físicas ou nas propriedades químicas do compósito. A finalidade de aplicação do compósito é que irá nortear a escolha do tipo de carga mais adequada [8].

O compósito de resina epóxi *gel coat*, também conhecida como tinta epóxi, é utilizado em superfícies que necessitam de aderência na camada superficial do substrato, pois sua alta fluidez proporciona um vazamento livre de imperfeições, permitindo que o material escoe penetrando em todos os detalhes da impressão, permitindo ser pincelada em espessuras finas em superfícies de moldes [5, 9].

O produto avaliado neste trabalho foi o compósito de resina epóxi *gel coat*, que se destaca no ramo de resinas há mais de três décadas. Uma das aplicações mais comuns para o compósito em estudo é como barreira química, ou seja, proteger o molde contra a ação de intempéries (ambientes agressivos). Em se tratando da estética, a resina precisa conferir a peça um acabamento colorido, liso e brilhante e, em relação ao substrato, é necessária uma base para aplicação da pintura. O *gel coat* possui uma excelente estabilidade de cor devido ao uso de pigmentos com alta estabilidade à luz e aditivos com absorvedores de UV que mantêm as cores por mais tempo. Possui um excelente brilho superficial e homogeneidade, garantindo as características de uma finalidade estética [9].

Por meio de ajustes de composição, é possível melhorar as propriedades como dureza, densidade e nível de escorrimto alterando a composição do material. O presente trabalho objetivou estudar a formulação de compósitos de resina epóxi/cargas inorgânicas visando à melhoria das propriedades físicas e mecânicas. Deste modo, foram elaborados ensaios a partir de mudanças nas proporções das cargas que constituem o material, a fim de garantir um produto com propriedades melhores do que a formulação original.

## 2. MATERIAIS E MÉTODOS

Foi realizado um planejamento experimental  $2^3$  completo, com três pontos centrais, para verificar as condições dos modelos. É possível elaborar um modelo matemático que, se validado estatisticamente, pode ser usado para obtenção da Superfície de Resposta e por meio desta análise determinar as condições otimizadas, conhecendo-se a significância estatística das respostas [10].

### 2.1 Preparação dos Compósitos

Este item aborda a preparação das formulações dos compósitos, a preparação do agente de cura e por seguinte a cura das amostras.

#### - Preparação das formulações de compósitos de resina epóxi *gel coat*

Foram preparadas 11 formulações de compósitos nos quais foram variadas em partes as cargas dióxido de titânio ( $\text{TiO}_2$ ), calcita ( $\text{CaCO}_3$ ) e barita ( $\text{BaSO}_4$ ) com as suas diferentes durezas e densidades de partícula, as quais três delas se repetem em iguais proporções de materiais, pontos centrais, para o cálculo do erro experimental, conforme descritos na Tabela 01 e na Tabela 02.

**Tabela 1:** Parâmetros dureza e densidade das cargas inorgânicas dióxido de titânio, calcita e barita com os níveis -1, 0 e +1.

| Parâmetros             | Dureza (Mohs) | Densidade ( $\text{g/cm}^3$ ) | Níveis |    |    |
|------------------------|---------------|-------------------------------|--------|----|----|
|                        |               |                               | -1     | 0  | +1 |
| TiO <sub>2</sub> (phr) | 2,5           | 3,88                          | 20     | 45 | 70 |
| calcita (phr)          | 3,0           | 2,65                          | 0      | 20 | 40 |
| barita (phr)           | 4,0           | 4,50                          | 0      | 20 | 40 |

phr = partes por 100 partes (*per hundred*)

Foram preparadas as amostras da resina epóxi *gel coat* de acordo com as quantidades de materiais calculados em cada formulação, conforme delineado no planejamento experimental  $2^3$  completo com três pontos centrais apresentado na Tabela 02.

De acordo com a Tabela 02, cada amostra variou as partes somente nas cargas, mantendo constantes as partes da resina epóxi base DGEBA e dos aditivos.

**Tabela 2:** Condições experimentais utilizadas no planejamento experimental, com variáveis codificadas e reais.

| Amostras | Variáveis Codificadas |         |        | Variáveis Reais        |               |              |
|----------|-----------------------|---------|--------|------------------------|---------------|--------------|
|          | TiO <sub>2</sub>      | calcita | barita | TiO <sub>2</sub> (phr) | calcita (phr) | barita (phr) |
| A 01     | -1                    | -1      | -1     | 20                     | 0             | 0            |
| A 02     | +1                    | -1      | -1     | 70                     | 0             | 0            |
| A 03     | -1                    | +1      | -1     | 20                     | 40            | 0            |
| A 04     | +1                    | +1      | -1     | 70                     | 40            | 0            |
| A 05     | -1                    | -1      | +1     | 20                     | 0             | 40           |
| A 06     | +1                    | -1      | +1     | 70                     | 0             | 40           |
| A 07     | -1                    | +1      | +1     | 20                     | 40            | 40           |
| A 08     | +1                    | +1      | +1     | 70                     | 40            | 40           |
| A 09     | 0                     | 0       | 0      | 45                     | 20            | 20           |
| A 10     | 0                     | 0       | 0      | 45                     | 20            | 20           |
| A 11     | 0                     | 0       | 0      | 45                     | 20            | 20           |

A Tabela 03 apresenta as matérias primas das formulações do compósito, seguindo uma ordem de adição, sendo a primeira a resina DGEBA, os aditivos e por fim, as cargas inorgânicas.

**Tabela 3:** Matérias primas utilizadas na preparação das amostras do compósito de resina epóxi *gel coat*.

| <b>Matérias primas</b>                               |
|------------------------------------------------------|
| Resina epóxi básica (DGEBA)                          |
| Endurecedor amínico                                  |
| Endurecedor amínico cicloalifático                   |
| Aditivo reológico                                    |
| Aditivo desaerante                                   |
| Aditivo tixotropante                                 |
| Aditivo dispersante                                  |
| Carga inorgânica dióxido de titânio TiO <sub>2</sub> |
| Carga inorgânica calcita CaCO <sub>3</sub>           |
| Carga inorgânica barita BaSO <sub>4</sub>            |

As matérias primas foram pesadas e inseridas em embalagem plástica de 500 mL para serem misturadas com o auxílio de um misturador de bancada com um dispersor Cowles acoplado (Agimix). A cada etapa de adição das matérias primas, foi necessária uma agitação de 30 segundos para assegurar que não houvesse grumos ou materiais sem misturar.

Ao fim da adição das mesmas, as amostras foram misturadas até a completa homogeneização e armazenadas fechadas a temperatura ambiente de 25 °C para alcançar a viscosidade, propriedade que garante a homogeneidade e agregação das cargas adicionadas nas fórmulas das amostras.

#### **- Preparação do agente de cura**

Para a preparação de 1,00 kg do agente de cura, quantidade necessária para cura das amostras, foi adicionada 0,85 kg de endurecedor amínico e 0,15 kg de endurecedor amínico cicloalifático em um béquer de 1000 mL e com o auxílio de uma espátula de metal foram misturados até obter a completa homogeneização.

#### **- Procedimento de cura das amostras**

As formulações de resina *gel coat* foram misturadas com o agente de cura seguindo os cálculos de proporção. Estas proporções foram realizadas por meio de cálculos estequiométricos referentes à quantidade de hidrogênio presente no agente de cura juntamente com a quantidade de hidrogênio presente na resina.

Após a determinação da quantidade do agente de cura em cada formulação, as amostras de resina foram misturadas com o auxílio de uma espátula de metal em um copo de cera de 300 mL, até alcançar a completa homogeneização. Na cura dos compósitos, cada amostra foi vazada em molde de silicone com formato quadrado à temperatura ambiente de 25 °C, permanecendo no mesmo por sete dias até alcançar a cura completa.

No ensaio de dureza, foram utilizados moldes com dimensões de 48 x 48 x 18 mm e para o ensaio de densidade foram utilizados moldes com dimensões de 13 x 13 x 25 mm. O ensaio de densidade pôde ser realizado um dia após a mistura compósito/agente de cura, por meio da cura inicial. Já o ensaio de dureza, foi possível dar início após o período de sete dias, pois é o tempo necessário para a cura completa do compósito.

## **2.2 Caracterização dos Compósitos**

Com a finalidade de avaliar as propriedades físicas e mecânicas dos compósitos, foram realizados ensaios de dureza, densidade e nível de escorrimto.

#### **- Dureza Shore D**

O procedimento para o ensaio de dureza foi realizado de acordo com a norma ASTM D 2240-05 [11]. Com a finalidade de determinar a dureza por penetração em polímeros rígidos, foi empregado um durômetro portátil da marca Instrutherm modelo GS 702, numa escala com variação de 0 a 100 Shore D.

Foram realizadas cinco medições em cada amostra, gerando-se a média e o desvio padrão. Cada medição foi realizada com distanciamento de 12 mm das bordas da amostra e entre cada uma foi obedecida uma distância de 6 mm com espessura mínima recomendada da amostra de 6 mm. Na medição, as amostras foram posicionadas sobre a base do aparelho durômetro de forma que a ponta do penetrador a tocasse em um ponto plano central. Na sequência foi pressionado o durômetro na amostra para a penetração, mantendo-se em pressão por no mínimo 5 segundos.

#### - Densidade Absoluta pelo método hidrostático

A determinação da densidade nas amostras de compósito foi realizada pelo método hidrostático, conforme a norma ASTM D 297 (1993 reapr. 1998) [12].

Os materiais utilizados na execução do ensaio foram uma balança analítica da marca Toledo resolução (0,0001), um béquer de 1000 mL, um suporte metálico, uma mesa auxiliar, um fio de cobre para suspensão do compósito a ser analisado, álcool para assepsia das amostras e água deionizada a temperatura de 25 °C.

As amostras das diferentes formulações contendo as alterações nas proporções de materiais foram pesadas em uma balança analítica. Foram retiradas as amostras, colocando o suporte metálico, mesa auxiliar e um béquer com água destilada para realizar a pesagem hidrostática. O fio de cobre foi imerso em álcool etílico para retirar o excesso de impurezas, e em seguida foi registrado o valor da massa do fio de cobre pesado. As amostras foram imersas em álcool etílico e secadas para retirada do excesso e na sequência foram pesadas de forma que elas ficassem imersas na água destilada contida no béquer com o auxílio do fio de cobre.

Para o cálculo da densidade absoluta pelo método hidrostático foi usada a Equação 01.

$$\text{Densidade Absoluta} = \frac{M_1 \times D}{M_1 - (M_2 - M_3)} \quad (01)$$

Onde:

$M_1$  - massa da amostra no ar (g);

$M_2$  - massa da amostra junto à massa do fio de cobre, imerso em água (g);

$M_3$  - massa do fio de cobre imerso em água (g);

D - densidade da água, com aproximação de  $1 \times 10^{-4} \text{ g/cm}^3$  na temperatura da água em 25 °C no momento do ensaio.

Para a determinação da densidade, foram realizadas cinco medições em cada amostra, gerando-se a média e o desvio padrão.

#### - Nível de escurimento

O nível de escurimento é uma propriedade pretendida de tintas que mostra uma superfície como planície com possíveis marcas. O escurimento é informado como um defeito em pinturas, particularmente em superfícies verticais. O nível de escurimento da resina *gel coat* foi determinado da seguinte forma. A mistura das formulações compósito/agente de cura foi aplicada com o auxílio de um pincel em um substrato plástico para verificação do nível de escurimento, analisada verticalmente. O compósito foi aplicado com o auxílio de um raspador, contendo três pares de folga com uma altura de 1 mm. A análise do nível de escurimento foi verificada durante aproximadamente 25 minutos após a aplicação. A instrução de trabalho determina quatro níveis de escurimento 0, 01, 02 e 03. O nível 0 é caracterizado como sendo sem escurimento do compósito aplicado, nível 01 (baixo escurimento), nível 02 (médio escurimento) e nível 3 (alto escurimento).

### 3. RESULTADOS E DISCUSSÃO

#### 3.1 Ensaios Físicos e Mecânicos

Foi realizada a análise estatística das variáveis independentes, dióxido de titânio, calcita e barita sobre as variáveis dependentes dureza e densidade.

#### - Dureza Shore D

A Tabela 04 apresenta as amostras da resina *gel coat* com as quantidades dos componentes inseridos nas formulações e os resultados da média aritmética de dureza Shore D junto ao seu desvio padrão.

**Tabela 4:** Resultado do ensaio de dureza

| Amostras | TiO <sub>2</sub><br>(phr) | calcita<br>(phr) | barita<br>(phr) | Dureza (Shore D) |
|----------|---------------------------|------------------|-----------------|------------------|
| A 01     | 20                        | 0                | 0               | 80,6 ± 0,9       |
| A 02     | 70                        | 0                | 0               | 68,0 ± 0,7       |
| A 03     | 20                        | 40               | 0               | 70,6 ± 0,9       |
| A 04     | 70                        | 40               | 0               | 66,8 ± 3,1       |
| A 05     | 20                        | 0                | 40              | 82,2 ± 0,4       |
| A 06     | 70                        | 0                | 40              | 75,2 ± 0,8       |
| A 07     | 20                        | 40               | 40              | 82,2 ± 0,8       |
| A 08     | 70                        | 40               | 40              | 76,8 ± 0,8       |
| A 09     | 45                        | 20               | 20              | 78,4 ± 0,5       |
| A 10     | 45                        | 20               | 20              | 79,0 ± 0,7       |
| A 11     | 45                        | 20               | 20              | 79,0 ± 1,0       |

Conforme pode ser observado na análise de variância (Tabela 05) e na carta de Pareto (Figura 02), foram significativos os valores de p menor do que 0,05 somente nas variáveis independentes TiO<sub>2</sub> e barita. Deste modo foi feito o modelo excluindo-se as interações uma vez que não são significativas e assim poder avaliar o erro puro e a falta de ajuste no modelo. Repetiu-se então a análise de variância (ANOVA), apresentada na Tabela 06.

**Tabela 5:** Análise de Variância ANOVA para variável dureza

| Fator                      | Soma dos quadrados | Graus de liberdade | Média quadrática | F        | p        |
|----------------------------|--------------------|--------------------|------------------|----------|----------|
| TiO <sub>2</sub>           | 103,6800           | 1                  | 103,6800         | 12,39922 | 0,024422 |
| Calcita                    | 11,5200            | 1                  | 11,5200          | 1,37769  | 0,305611 |
| Barita                     | 115,5200           | 1                  | 115,5200         | 13,81518 | 0,020530 |
| TiO <sub>2</sub> x Calcita | 13,5200            | 1                  | 13,5200          | 1,61687  | 0,272433 |
| TiO <sub>2</sub> x Barita  | 2,0000             | 1                  | 2,0000           | 0,23918  | 0,650402 |
| Calcita x Barita           | 20,4800            | 1                  | 20,4800          | 2,44923  | 0,192635 |
| Erro                       | 33,4473            | 4                  | 8,3618           |          |          |
| Soma dos quadrados total   | 300,1673           | 10                 |                  |          |          |

A Figura 02 apresenta o diagrama de Pareto para verificação da influência das cargas avaliadas sobre a dureza das amostras.

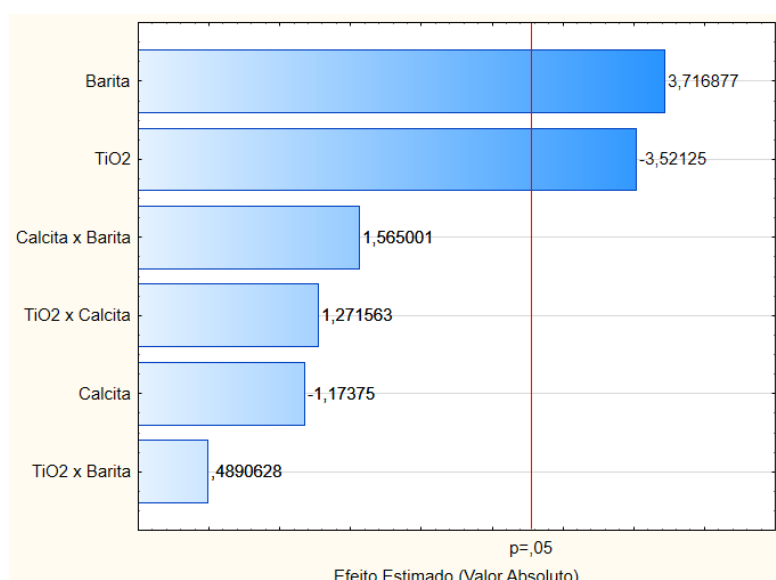

**Figura 2:** Diagrama de Pareto da variável dependente dureza relacionado com as variáveis independentes, barita, TiO<sub>2</sub> e calcita.

**Tabela 6:** Análise de variância da dureza, utilizando o erro puro para verificação da falta de ajuste.

| Fator                    | Soma dos quadrados | Graus de liberdade | Média quadrática | F        | p        |
|--------------------------|--------------------|--------------------|------------------|----------|----------|
| TiO <sub>2</sub>         | 103,6800           | 1                  | 103,6800         | 864,0000 | 0,001155 |
| Calcita                  | 11,5200            | 1                  | 11,5200          | 96,0000  | 0,010257 |
| Barita                   | 115,5200           | 1                  | 115,5200         | 962,6667 | 0,001037 |
| Falta de Ajuste          | 69,2073            | 5                  | 13,8415          | 115,3455 | 0,008617 |
| Erro puro                | 0,2400             | 2                  | 0,1200           |          |          |
| Soma dos quadrados Total | 300,1673           | 10                 |                  |          |          |

Conforme pode ser observada na Tabela 06, a falta de ajuste foi significativa, isso indica que o modelo linear não descreve satisfatoriamente a influência das cargas sobre a variável dureza. O  $R^2$  foi igual a 0,768, indicando que 23,2 % das respostas não são explicadas pelo modelo.

A especificação do compósito de resina *gel coat* em relação à dureza é  $85 \pm 5$  Shore D, valor especificado para este produto. Os resultados do ensaio de dureza (Tabela 04) variaram de 66,8 a 82,2 Shore D, onde os que se encontram dentro da especificação foram as amostras A01, A05, A07. As amostras que apresentaram maior quantidade de TiO<sub>2</sub> influenciaram negativamente na dureza, devido à sua baixa dureza em relação as outras cargas inorgânicas utilizadas, podendo ser observado uma redução no valor desta propriedade nas amostras A02, A03, A04, A06, A08.

Comparando-se as amostras A01 e A02, A03 e A04, A05 e A06, A07 e A08, há um aumento das partes de TiO<sub>2</sub> de 20 partes para 70 partes. Com isto, observa-se que nas amostras com menor quantidade de TiO<sub>2</sub>, a dureza foi maior. Desta forma, é possível dizer que um aumento das partes do TiO<sub>2</sub> nas formulações dos compósitos, diminui a dureza.

De acordo com Castro (2009), em 1918 novos pigmentos como o TiO<sub>2</sub> foram inseridos em formulações, melhorando algumas propriedades das tintas, tais como a alvura e o poder de cobertura [13]. Deste modo, pode-se dizer então que o TiO<sub>2</sub> traz outras propriedades para o compósito estudado neste trabalho.

Seerig (2013) observou que nas amostras que foram adicionados maior quantidade de TiO<sub>2</sub>, seu brilho ficou demasiadamente elevado, devido ao seu alto índice de refração [14].



Neste trabalho, em relação à barita, é possível observar que duas das formulações que tiveram um valor de dureza dentro da especificação (amostras A05 e A07), traziam barita na quantidade máxima prevista pelo modelo. A amostra A05, apresenta a mesma dureza (82,2 Shore D), variando apenas no desvio padrão e na quantidade de calcita em relação à amostra A07. Assim, pode-se concluir que para a dureza a adição da calcita, carga que barateia o custo de materiais, não exerceu influência significativa nos resultados.

Câmara (2011), quando utilizou barita no composto de borracha EPDM, obteve um aumento na dureza Shore A quando aumentou as quantidades da barita, ou seja, quanto maior a concentração da barita presente no composto, maiores os resultados de dureza. Desta forma, a barita exerce um efeito positivo nesta propriedade [15].

Como pôde ser visualizado nos resultados deste trabalho, o que atendeu a uma dureza dentro da especificação foi o aumento da barita e a redução do  $TiO_2$ .

#### - Densidade

A Tabela 07 apresenta as amostras do compósito com as quantidades dos componentes inseridos nas formulações e os resultados da média aritmética de densidade junto ao seu desvio padrão.

**Tabela 7:** Resultado do ensaio de densidade

| Amostras | $TiO_2$<br>(phr) | calcita<br>(phr) | barita<br>(phr) | Densidade (g/cm <sup>3</sup> ) |
|----------|------------------|------------------|-----------------|--------------------------------|
| A 01     | 20               | 0                | 0               | 1,2638 ± 0,0067                |
| A 02     | 70               | 0                | 0               | 1,5068 ± 0,0063                |
| A 03     | 20               | 40               | 0               | 1,4120 ± 0,0019                |
| A 04     | 70               | 40               | 0               | 1,6147 ± 0,0071                |
| A 05     | 20               | 0                | 40              | 1,4279 ± 0,0052                |
| A 06     | 70               | 0                | 40              | 1,6706 ± 0,0070                |
| A 07     | 20               | 40               | 40              | 1,5778 ± 0,0081                |
| A 08     | 70               | 40               | 40              | 1,7191 ± 0,0063                |
| A 09     | 45               | 20               | 20              | 1,5248 ± 0,0065                |
| A 10     | 45               | 20               | 20              | 1,5347 ± 0,0073                |
| A 11     | 45               | 20               | 20              | 1,5532 ± 0,0092                |

Na Tabela 08 está apresentada a análise de variância da densidade das amostras.

**Tabela 8:** Análise de variância (ANOVA) da densidade

| Fator                    | Soma dos quadrados | Graus de liberdade | Média quadrática | F        | p        |
|--------------------------|--------------------|--------------------|------------------|----------|----------|
| $TiO_2$                  | 0,086050           | 1                  | 0,086050         | 269,5802 | 0,000081 |
| Calcita                  | 0,025830           | 1                  | 0,025830         | 80,9220  | 0,000845 |
| Barita                   | 0,044703           | 1                  | 0,044703         | 140,0481 | 0,000292 |
| $TiO_2$ x Calcita        | 0,002511           | 1                  | 0,002511         | 7,8674   | 0,048569 |
| $TiO_2$ x Barita         | 0,000474           | 1                  | 0,000474         | 1,4850   | 0,289949 |
| Calcita x Barita         | 0,000416           | 1                  | 0,000416         | 1,3020   | 0,317531 |
| Erro                     | 0,001277           | 4                  | 0,000319         |          |          |
| Soma dos Quadrados Total | 0,161262           | 10                 |                  |          |          |

A Figura 03 apresenta o diagrama de Pareto para a verificação da influência das cargas avaliadas sobre a densidade das amostras obtidas das diferentes formulações.



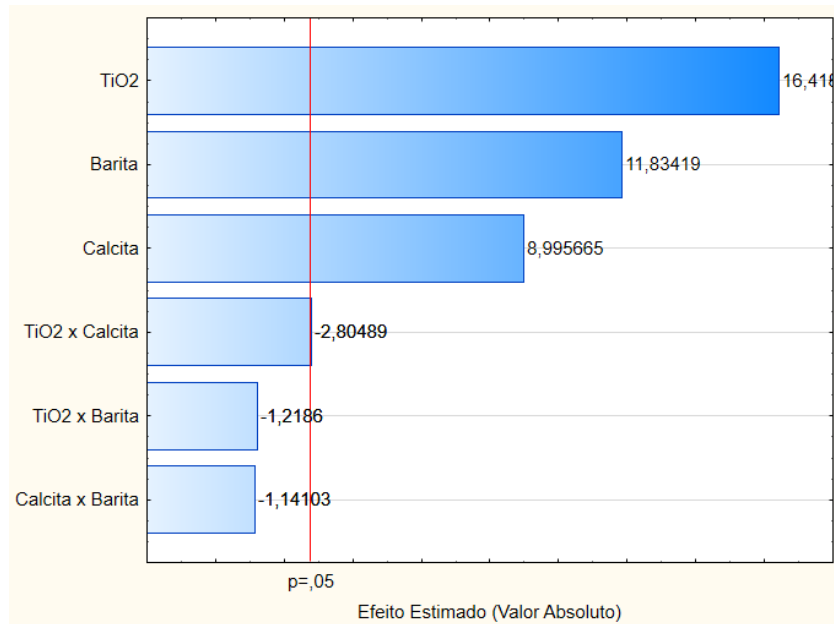

**Figura 3:** Diagrama de Pareto da variável dependente densidade relacionado com as variáveis independentes, barita, TiO<sub>2</sub> e calcita.

Conforme podem ser observadas no diagrama de Pareto (Figura 03) e na ANOVA (Tabela 08) as interações não são significativas, exceto a interação do TiO<sub>2</sub> com a calcita que teve um valor de p igual a 0,048, que é no limite estabelecido de nível de significância em  $p = 0,05$  e nível de confiança de 95%. Sendo assim, repetiu-se a ANOVA, excluindo as interações. A nova análise de variância, excluindo as interações do modelo e utilizando o erro puro para visualização da falta de ajuste está apresentada na Tabela 09.

**Tabela 9:** Análise de variância (ANOVA) para variável densidade utilizando o erro puro.

| Fator                    | Soma dos quadrados | Graus de liberdade | Média quadrática | F        | p        |
|--------------------------|--------------------|--------------------|------------------|----------|----------|
| TiO <sub>2</sub>         | 0,086050           | 1                  | 0,086050         | 414,4888 | 0,002404 |
| Calcita                  | 0,025830           | 1                  | 0,025830         | 124,4203 | 0,007942 |
| Barita                   | 0,044703           | 1                  | 0,044703         | 215,3288 | 0,004612 |
| Falta de ajuste          | 0,004262           | 5                  | 0,000852         | 4,1063   | 0,207359 |
| Erro Puro                | 0,000415           | 2                  | 0,000208         |          |          |
| Soma dos Quadrados Total | 0,161262           | 10                 |                  |          |          |

Na análise da variável densidade é possível observar que as três variáveis independentes são significativas e que a falta de ajuste não foi significativa. Deste modo, o modelo representa adequadamente o comportamento experimental.

Isso pode ser observado pelo valor do  $R^2$  que é 0,971, o que indica que 97,1 % dos valores obtidos experimentalmente são representados pelo modelo.

Os coeficientes de regressão do modelo são apresentados na Tabela 10.

**Tabela 10:** Coeficientes de regressão do Modelo.

| Fator            | Coef.Regressão | Erro puro | t(2)     | p        | -95%     | +95%     |
|------------------|----------------|-----------|----------|----------|----------|----------|
| Média            | 1,209504       | 0,012444  | 97,19520 | 0,000106 | 1,155962 | 1,263047 |
| TiO <sub>2</sub> | 0,004149       | 0,000204  | 20,35900 | 0,002404 | 0,003272 | 0,005025 |
| Calcita          | 0,002841       | 0,000255  | 11,15439 | 0,007942 | 0,001745 | 0,003937 |
| Barita           | 0,003738       | 0,000255  | 14,67409 | 0,004612 | 0,002642 | 0,004834 |

A partir dos coeficientes de regressão da Tabela 10, pode-se obter o modelo de densidade, apresentado na Equação 02. A partir desta equação é possível prever os valores ideais de cargas a fim de obter densidades na faixa de  $1,65 \pm 0,05 \text{ g/cm}^3$ , valores especificados para este produto. Por meio do modelo, descrito na Equação 02, é possível verificar que o sinal positivo na frente da quantidade de TiO<sub>2</sub>, calcita e barita, o que demonstra que as três cargas avaliadas influenciam de forma positiva, ou seja, quando são aumentadas as quantidades das cargas, há um aumento na densidade.

$$D = 1,21 + 0,004 \times \text{TiO}_2 + 0,0028 \times \text{Calcita} + 0,004 \times \text{Barita} \quad (02)$$

Partindo do modelo é possível obter as superfícies de resposta e as curvas de contorno para a variável densidade apresentadas nas Figuras 04, 05 e 06. As curvas de contorno representam a base dos gráficos de superfícies de resposta para uma melhor visualização dos resultados.

Os resultados do ensaio de densidade apresentados na tabela 06 variaram de 1,26 a 1,71  $\text{g/cm}^3$ , tendo como valores dentro da especificação as amostras A04 e A06.

Para obtenção de valores de densidade variando em  $1,65 \pm 0,05 \text{ g/cm}^3$ , valor conhecido que confere as melhores propriedades físicas para o compósito, a superfície de resposta (a) e a curva de contorno (b), da Figura 04, aponta para cargas de TiO<sub>2</sub> maior do que 60 partes, calcita maior do que 30 partes e com barita fixada em 20 partes.

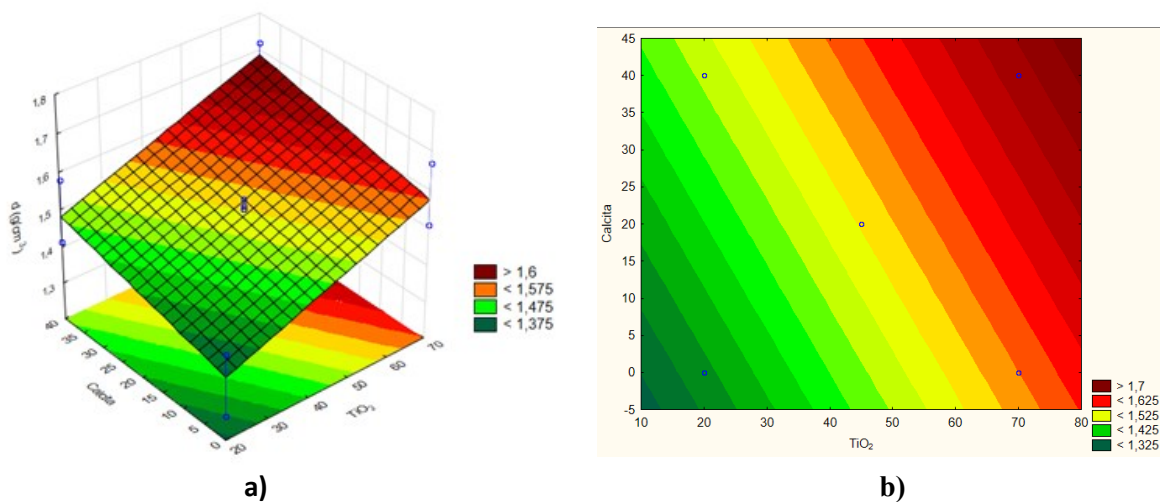

**Figura 4:** (a) Superfície de resposta e (b) curvas de contorno da influência da carga de calcita e TiO<sub>2</sub> sobre a variável dependente densidade, fixando-se a carga de barita no ponto central (20 phr).

Na superfície de resposta (a) e curva de contorno (b) da Figura 05, pode ser observado que se a calcita estiver fixada em 20 partes obtêm-se valores de densidade dentro dos valores esperados se as cargas de TiO<sub>2</sub> forem maiores do que 50 partes e desde que a barita for maior do que 25 partes.

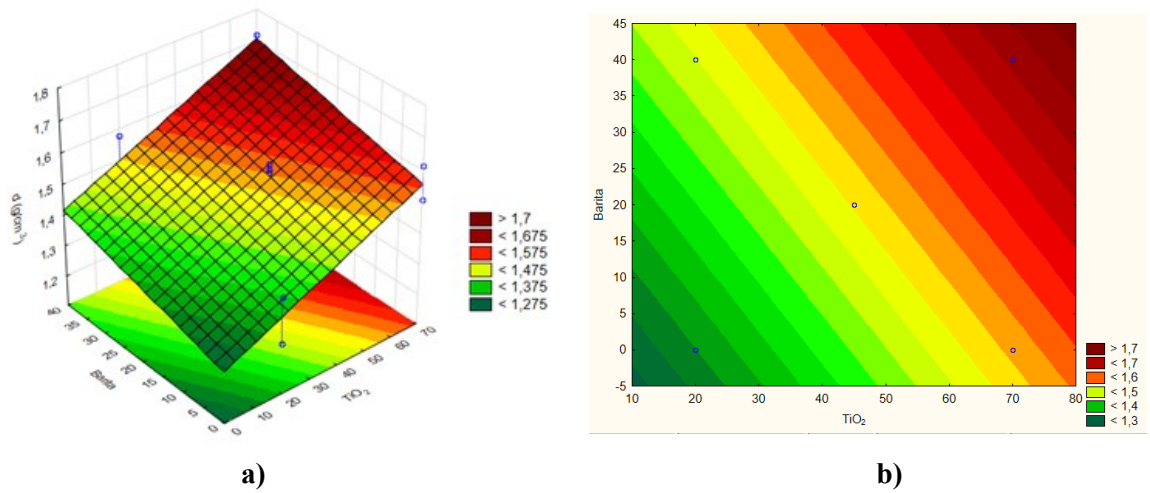

**Figura 5:** (a) Superfície de resposta e (b) curvas de contorno da influência da carga de barita e  $\text{TiO}_2$  sobre a variável dependente densidade, fixando-se a carga de calcita no ponto central (20 phr).

Na superfície de resposta (a) e curva de contorno (b) da Figura 06 fica bem claro que não é possível obter valores de densidade acima de  $1,6 \text{ g/cm}^3$  se a carga de  $\text{TiO}_2$  estiver no ponto central (45 partes), mostrando a influência positiva desta carga sobre a densidade da amostra.

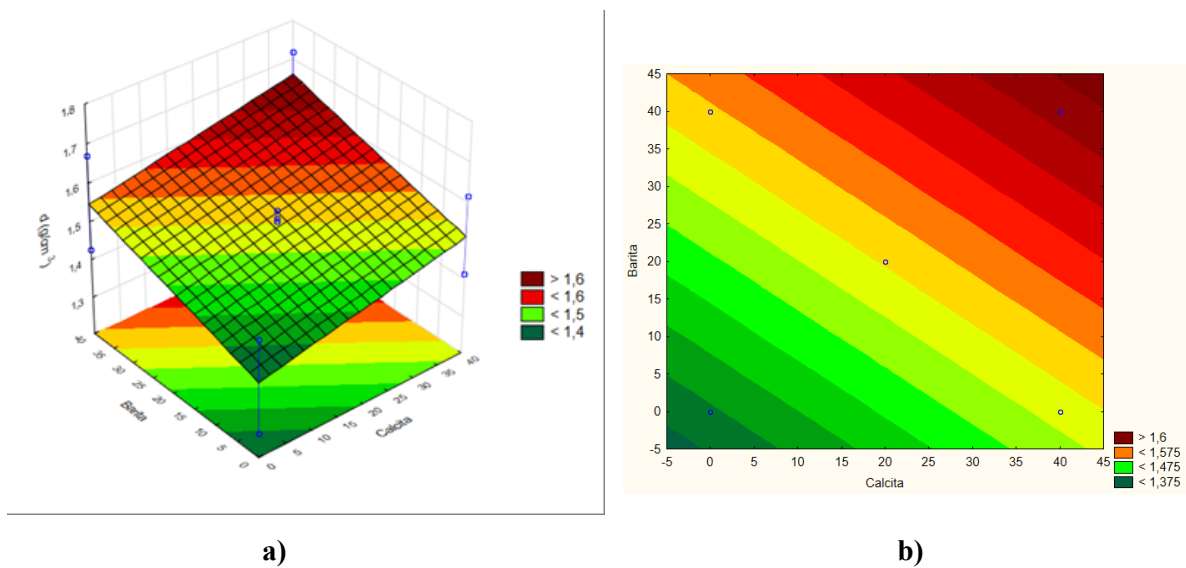

**Figura 6:** (a) Superfície de resposta e (b) curvas de contorno da influência da carga de barita e calcita sobre a variável dependente densidade, fixando-se a carga de  $\text{TiO}_2$  no ponto central (45 phr).

Analisando conjuntamente as duas propriedades avaliadas, dureza e densidade, a redução das quantidades de  $\text{TiO}_2$ , o que diminuiria o custo da resina, pode diminuir a densidade do mesmo, não chegando ao valor mínimo especificado para este produto. Não foi possível descrever a influência das cargas sobre a dureza do material por meio de um modelo, porém, observando os resultados da Tabela 04, verifica-se que o aumento da carga de  $\text{TiO}_2$  (amostras A02, A04 e A06 em relação as amostras A01, A03 e A05) diminui a dureza do material. Sendo assim, verifica-se que a empresa já está utilizando a carga de  $\text{TiO}_2$  em quantidade adequada, pois a redução dessa carga afetaria negativamente a densidade e o aumento da mesma, que não é economicamente interessante, diminuiria a dureza.

De acordo com Lima (2007), a densidade dos minerais é uma característica observada pelos fabricantes de peças com polímeros. Particularmente, a barita (massa específica 4,3 a  $4,6 \text{ g/cm}^3$ ) é utilizada como carga quando se deseja obter produtos finais com maior densidade [16].

A fim de validar o modelo proposto para densidade foi realizado um experimento em triplicata nas quantidades de cargas utilizadas pela empresa (60 partes de  $\text{TiO}_2$ , 30 partes de calcita e 20 partes de barita), comparando o resultado com a simulação utilizando o modelo. Esta comparação está apresentada na Figura 07.

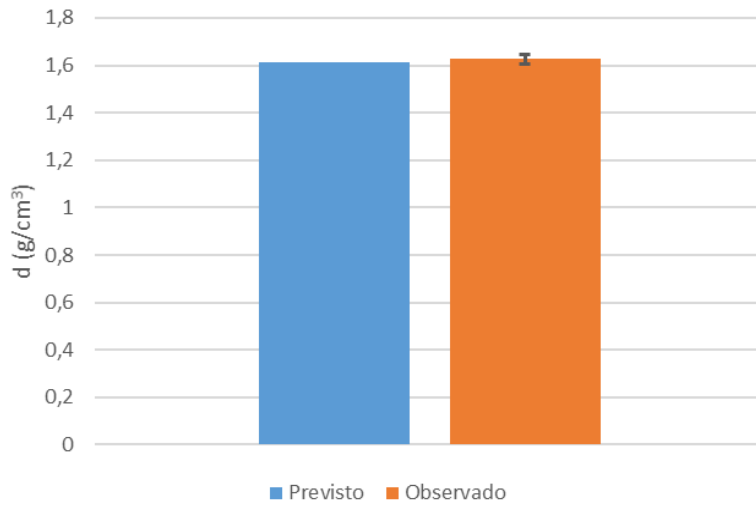

**Figura 7:** Comparação entre os valores de densidade previstos pelo modelo e observados experimentalmente.

Conforme pode ser observado no gráfico da Figura 07 o modelo para densidade descreve adequadamente os experimentos. Nessas condições o valor de dureza obtido foi  $81,7 \pm 1,3$  e o nível de escorrimento avaliado foi em nível 0 (sem escorrimento). Assim, sugere-se que a empresa mantenha a formulação que vem aplicando, pois está adequada às especificações exigidas.

**- Nível de escorrimento**

Conforme descrito na Instrução de trabalho de qualidade Hard (ITQH), pode-se verificar quatro níveis de escorrimento na resina epóxi *gel coat* após 25 minutos de aplicação. O nível 0 descreve um filme de tinta aplicado sem perfil de escorrimento ao longo da seção de pintura. No nível 01 é percebido um leve escorrimento com pequenos pontos. O nível 02 é descrito por um médio escorrimento, ou seja, quando há formação de gotas escorridas. O nível 03 é caracterizado por um alto escorrimento, chegando a formar camada sobre camada da tinta aplicada (Figura 8)

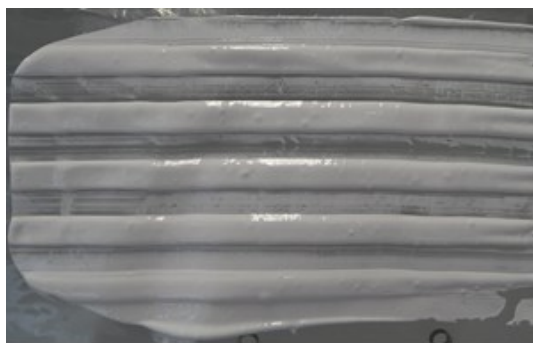

Nível 0

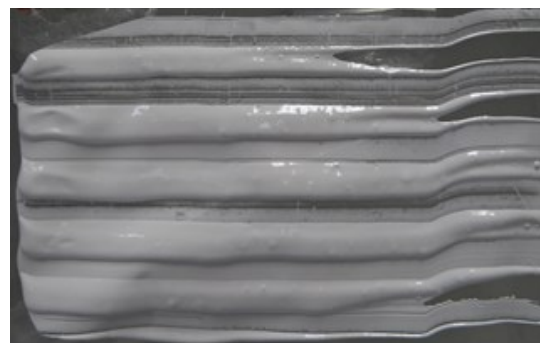

Nível 01

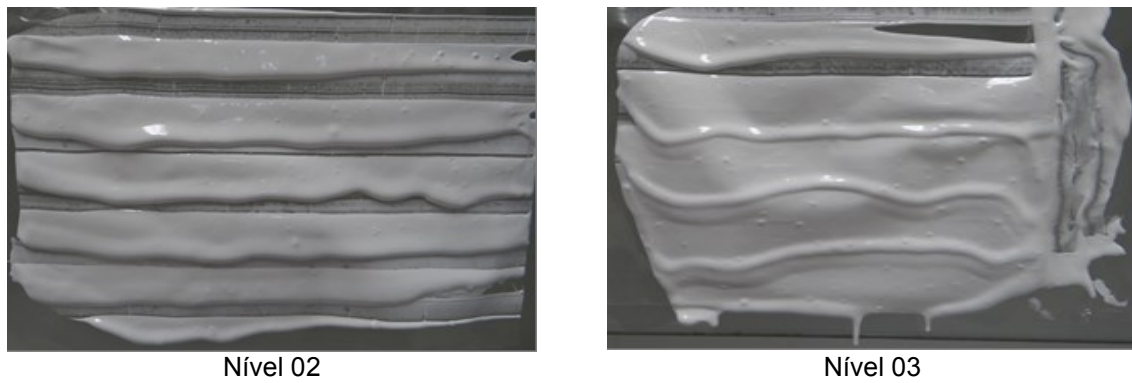

**Figura 8:** Classificação em níveis de escorrimento das amostras de resina *gel coat*.

Nas imagens apresentadas na Figura 9, cada formulação apresentou um nível de escorrimento, podendo ser classificado conforme as imagens da figura 8.

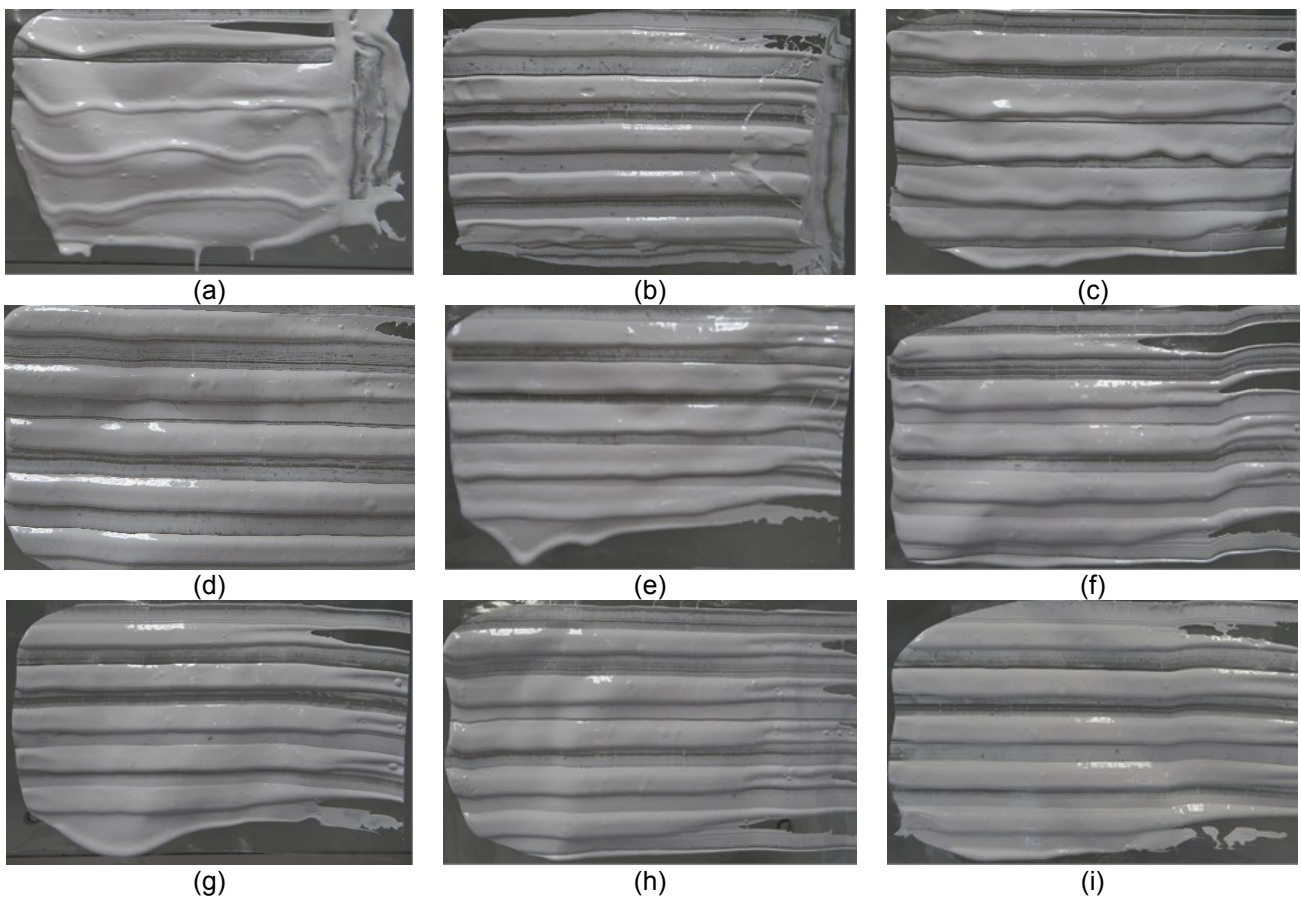

**Figura 9:** Ensaio de nível de escorrimento das amostras de resina *gel coat*: a) Amostra 01 com Nível 03 de escorrimento; b) Amostra 02 com nível 0 de escorrimento; c) Amostra 03 com nível 02 de escorrimento; d) Amostra 04 com nível 0 de escorrimento; e) Amostra 05 com nível 02 de escorrimento; f) Amostra 06 com nível 01 de escorrimento; g) Amostra 07 com nível 01 de escorrimento; h) Amostra 08 com nível 01 de escorrimento; i) Amostra 09 com nível 0 de escorrimento.

O que caracteriza o escorrimento do compósito são as quantidades e os tipos de materiais que irão ser adicionados para evitar este fenômeno. Se a viscosidade de uma tinta é baixa, significa que na aplicação poderá ocorrer um escorrimento por conta da fluidez da mesma devido à gravidade. Quando uma formulação de

compósito é carregada o suficiente com cargas, pode-se perceber que na aplicação haverá pouco ou não haverá formação de perfil de escorrimento.

Pode-se observar que as amostras A01, A03 e A05 (Figura 9), apresentaram níveis significativos de escorrimento da resina após 25 minutos de aplicação. Isto pode ser explicado pela redução na quantidade de carga nas formulações em relação às demais amostras que não apresentaram um escorrimento significativo. A melhor aplicação do compósito, não apresentando nenhum escorrimento, foram as amostras A07 e A09 e o experimento realizado em triplicata (60 partes de  $\text{TiO}_2$ , 30 partes de calcita e 20 partes de barita), que apresentaram maiores quantidades de cargas agregadas a resina.

#### 4. CONCLUSÕES

Este estudo permitiu uma melhor compreensão da influência das características físicas das cargas inorgânicas ( $\text{TiO}_2$ , calcita e barita) incorporadas nas formulações de resina epóxi *gel coat* por meio de um planejamento experimental em relação as propriedades de dureza, densidade e nível de escorrimento. Levando-se em consideração a propriedade dureza, não foi possível obter gráficos de superfície de resposta, pois o modelo linear não descreveu satisfatoriamente a influência das cargas sobre esta variável. A variável densidade atendeu aos requisitos para a construção dos gráficos de superfície e das curvas de contorno. Assim foi possível analisar os gráficos e as curvas e concluir as composições adequadas para garantir esta propriedade. Pode-se perceber que o  $\text{TiO}_2$ , carga que confere o maior custo dentre as cargas avaliadas, não seria a mais indicada para fazer parte de uma formulação onde deseja-se obter maiores valores de dureza. Mas por outro lado, o  $\text{TiO}_2$  tem a característica de possuir alto poder de cobertura e alvura na tinta. Em se tratando da densidade, não foi possível reduzir o  $\text{TiO}_2$  menos do que 60 partes para obter valores dentro da especificação da empresa de  $1,65 \pm 0,05 \text{ g/cm}^3$ . Pode-se perceber que a redução dessa carga na formulação afetaria negativamente a densidade e o aumento da mesma, que não é economicamente viável, diminuiria a dureza. Em relação à carga barita, percebe-se um melhoramento nos resultados das propriedades dureza, densidade e nível de escorrimento, enquanto, que a carga calcita não exerce influência significativa nestas propriedades. Para o ensaio de nível de escorrimento tiveram como melhores resultados, as amostras que apresentaram um maior carregamento de cargas inorgânicas. Com o objetivo de validar o modelo proposto para a densidade, o experimento realizado em triplicata nas quantidades de cargas utilizadas pela empresa (60 partes de  $\text{TiO}_2$ , 30 partes de calcita e 20 partes de barita), apresentou resultados satisfatórios nessas condições com valor de dureza de  $81,7 \pm 1,3$  Shore D, densidade de  $1,61 \text{ g/cm}^3$  e nível 0 (sem escorrimento) no ensaio de nível de escorrimento. Deste modo, é possível concluir que dentre as amostras realizadas para os ensaios de dureza, densidade e nível de escorrimento no planejamento experimental, nenhuma se adequou inteiramente as especificações exigidas pela empresa. Assim, sugere-se que a empresa Hard mantenha a formulação que vem aplicando, pois esta encontra-se adequada às especificações exigidas.

#### 5. AGRADECIMENTOS

Ao curso de Engenharia Química da Universidade da Região de Joinville (UNIVILLE) pelo suporte no desenvolvimento deste trabalho.

#### 6. BIBLIOGRAFIA

- [1] CANEVAROLO JR., S.V., *Ciência dos Polímeros: Um texto básico para tecnólogos e engenheiros*, 3 ed., São Paulo, Editora Artliber, 2015.
- [2] BITENCOURT, C.S., PANDOLFELLI, V.C. “Resinas termofixas e a produção de refratários contendo carbono: base teórica e insights para futuros desenvolvimentos”, *Cerâmica*, v.59, pp.1-26, 2013.
- [3] SILAEX, Epóxi. Disponível em: <http://www.silaex.com.br/resinas%20ep%C3%B3xi.htm>. Data de acesso: 30 de agosto de 2017.
- [4] LIMA, J.E.S., ASSUMPÇÃO, T.A.A., AZEREDO, E.A., *et al.*, “Estudo preliminar de reforço de material polimérico por meio de fibras de carbono”, *Revista Caleidoscópio*, v.1, n.9, pp.22-29, 2017.
- [5] DIAS, S.C., ÁVILA, G.B., PANZERI, H., *et al.*, “Análise da capacidade de reprodução de detalhes expressa por diferentes materiais de modelagem”, *Arquivos em Odontologia*, v.43, n.4, pp.137-143, 2007.
- [6] LEVY NETO, F., PARDINI, L.C. *Compósitos Estruturais: Ciência e Tecnologia*, 2 ed., São Paulo, Editora Edgard Blücher, 2016.
- [7] CALLISTER JR., W.D. *Ciência e Engenharia de Materiais: Uma Introdução*, 9 ed., Rio de Janeiro, Editora LTC, 2016.

- [8] RABELLO, M. *Aditivação de Polímeros*, Artliber, São Paulo, 2007.
- [9] SALEHI-SCHNEIDER, S., GRIMM, F. “A revolutionary auxiliary film development for composite manufacturing”, *Reinforced Plastics*, in press, 2007. Disponível em: <http://dx.doi.org/10.1016/j.repl.2017.05.001>. Data de acesso: 30 de Agosto de 2017.
- [10] RODRIGUES, M.I., IEMMA, A.F. *Planejamento de Experimentos e Otimização de Processos*, 3 ed. Campinas, SP, Casa do Pão Editora, 2014.
- [11] ASTM D 2240. Standard test method for rubber property – durometer hardness, 2010.
- [12] ASTM D 297 (1993 reapr. 1998). Test methods for rubber property chemicals analysis - item 16.3, 1998.
- [13] CASTRO, C.D., *Estudo da influência das propriedades de diferentes cargas minerais no poder de cobertura de um filme de tinta*, Tese de D.Sc., Programa de Pós-Graduação em Engenharia de Minas, UFRGS, Porto Alegre, RS, Brasil, 2009.
- [14] SEERIG, R. *Estudo da influência de cargas minerais utilizadas em tintas imobiliárias*, Trabalho de Diplomação em Engenharia Química, Escola de Engenharia, Departamento de Engenharia Química da Universidade Federal do Rio Grande de Sul, Porto Alegre, 2013.
- [15] CÂMARA, J.R., *Obtenção e caracterização de compostos elastoméricos a base de EPDM carregados com barita para serem empregados na fabricação de vestimentas para proteção radiológica*, Dissertação de M.Sc., Universidade Presbiteriana Mackenzie, São Paulo, SP, Brasil, 2011.
- [16] LIMA, A.B.T. *Aplicações de cargas minerais em polímeros*, Dissertação de M.Sc., Escola Politécnica da Universidade de São Paulo, São Paulo, 2007.
